# Supplementary material for: Effects of a High-Fat Diet and Docosahexaenoic Acid during Pregnancy on Fatty Acid Composition in the Fetal Livers of Mice
Source: MDPI journal article supplement (doi:10.3390/nu15214696), 2023-11-06
Supplement: s1 [file s1]

## MATERNAL TISSUES

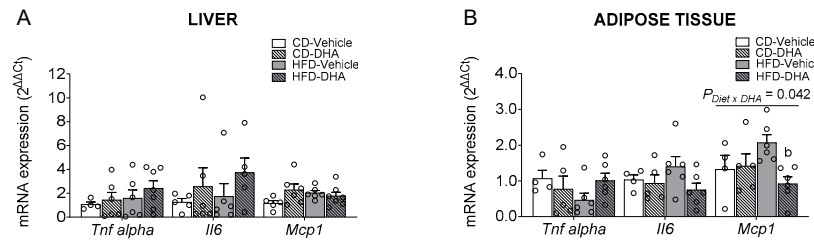

## PLACENTA

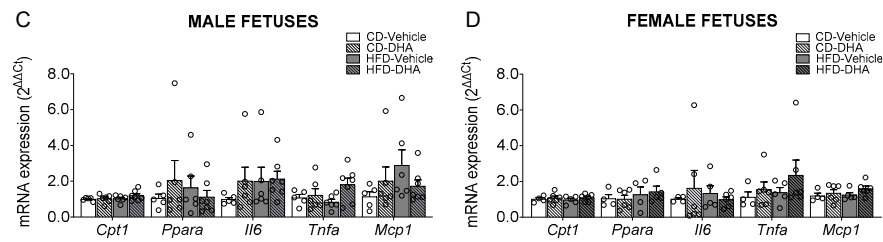

## FETAL LIVER

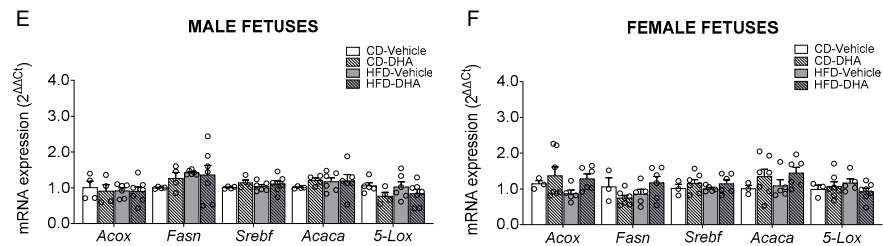

**Supplementary Figure 1. Gene expression (mRNA) in maternal tissues, placentas and fetal liver of male and female fetuses from dams fed with a control diet (CD), high-fat diet (HFD), and treated with vehicle (sunflower oil) or docosahexaenoic acid (DHA) during pregnancy. (A and B) Gene expression of tumoral necrosis factor alpha (*Tnf alpha*), interleukin-6 (*Il6*), and monocyte chemoattractant protein-1 (*Mcp1*) in the maternal liver and adipose tissue. (C - D) carnitine palmitoyltransferase I (*Cpt1*), peroxisome proliferator-activated receptor alpha (*Ppara*), *Il6*, *Tnfa*, and *Mcp1* in placental tissue from male and female fetuses. (E - F) Gene expression of Acyl-CoA oxidase (*Acox*), fatty acid synthase (*Fasn*), sterol regulatory element binding transcription factor (*Srebf*), acetyl-CoA carboxylase alpha (*Acaca*), and 5-lipoxygenase (*5-Lox*) in the liver of male and female fetuses. Values are means  $\pm$  SEM. Two-way ANOVA followed Sidak's post-test was performed to calculate the differences.**
