# Supplementary material for: Effects of a High-Fat Diet and Docosahexaenoic Acid during Pregnancy on Fatty Acid Composition in the Fetal Livers of Mice
Source: MDPI journal article supplement (doi:10.3390/nu15214696), 2023-11-06
Supplement: s1 [file s1]

Supplemental Table 1. Primers sequences

| Gen            | Protein name                                           | Sequence primers                                                                           | Tm (°C)      | GC (%)       | Gene ID |
|----------------|--------------------------------------------------------|--------------------------------------------------------------------------------------------|--------------|--------------|---------|
| <i>Mfsd2a</i>  | Major facilitator superfamily domain containing 2A     | F: 5' - TCTGGTGGGCTTCTGCATTAG - 3'<br>R: 5' - GATGGGAAGTCAGGCACAAAC - 3'                   | 61.3<br>61.3 | 52.4<br>52.4 | 76574   |
| <i>Lipg</i>    | Endothelial lipase                                     | F: 5' - ATGCGAAACACGGTTTTTCCTG - 3'<br>R: 5' - GGACGCAAGGTTGTGATACTTC - 3'                 | 59.4<br>62.1 | 47.6<br>50.0 | 16891   |
| <i>Sc127a4</i> | Fatty acid transporter 4                               | F: 5' - GACTTCTCCAGCCGTTTCCA - 3'<br>R: 5' - AGGACAGGATGCGGCTATTG - 3'                     | 60.5<br>60.5 | 55.0<br>55.0 | 26569   |
| <i>Cd36</i>    | Fatty acid translocase                                 | F: 5' - GGCTGTGTTTGGAGGCATTC - 3'<br>R: 5' - CCACGTCATCTGGGTTTTGC - 3'                     | 60.5<br>60.5 | 55.0<br>55.0 | 12491   |
| <i>Cpt1</i>    | Carnitine palmitoyltransferase I                       | F: 5' - CTCAGTGGGAGCGACTCTTCA - 3'<br>R: 5' - GGCCTCTGTGGTACACGACAA - 3'                   | 63.3<br>63.3 | 57.1<br>57.1 | 12894   |
| <i>Acs11</i>   | Long-chain acyl-CoA synthetase 1                       | F: 5' - TCTTGGTGTACTACTACGACGAT - 3'<br>R: 5' - CGAGAACCTAAACAAGGACCATT - 3'               | 61.1<br>61.1 | 43.5<br>43.5 | 14081   |
| <i>Acox</i>    | Acyl-CoA oxidase                                       | F: 5' - TCGAAGCCAGCGTTACGAG - 3'<br>R: 5' - GGTCTGCGATGCCAAATTCC - 3'                      | 59.5<br>60.5 | 57.9<br>55.0 | 11430   |
| <i>Acaca</i>   | Acetyl-CoA carboxylase alpha                           | F: 5' - CCTGACAAACGAGTCTGGCT - 3'<br>R: 5' - CATTCCATGCAGTGGTCCCT - 3'                     | 62.2<br>63.1 | 55.0<br>55.0 | 107476  |
| <i>Fasn</i>    | Fatty acid synthase                                    | F: 5' - GCTGCGGAAACTTCAGGAAAT - 3'<br>R: 5' - AGAGACGTGTCACTCCTGGACTT - 3'                 | 59.4<br>64.7 | 47.0<br>52.2 | 14104   |
| <i>Srebf1</i>  | Sterol regulatory element binding transcription factor | F: 5' - ACTGGCCGAGATGTGCGAA - 3'<br>R: 5' - AGCATAGGGGGCGTCAAACA - 3'                      | 59.5<br>60.5 | 57.9<br>55.0 | 20787   |
| <i>5-Lox</i>   | 5-lipoxygenase                                         | F: 5' - AGTGACAGGGTCAAGAAGTTGG - 3'<br>R: 5' - GCCCCGTTCGAAGTCATTGT - 3'                   | 60.2<br>61.0 | 50.0<br>55.0 | 11689   |
| <i>Ppara</i>   | Peroxisome proliferator-activated receptor alpha       | F: 5' - CTGGGCAAGAGAATCCACGA - 3'<br>R: 5' - CGTCTTCTCGGCCATACACA - 3'                     | 60.5<br>60.5 | 55.0<br>55.0 | 19013   |
| <i>Il-6</i>    | Interleukin 6                                          | F: 5' - GAGACTTCCATCCAGTTGCCT - 3'<br>R: 5' - TGGGAGTGGTATCCTCTGTGA - 3'                   | 61.3<br>61.3 | 52.0<br>52.0 | 16193   |
| <i>Tnfa</i>    | Tumoral necrosis factor alpha                          | F: 5' - CACCACGCTCTTCTGTCTACT - 3'<br>R: 5' - GGTCTGGGCCATAGAACTGAT - 3'                   | 61.3<br>61.3 | 52.0<br>52.0 | 21926   |
| <i>Mcp1</i>    | Monocyte chemoattractant protein - 1                   | F: 5' - CCTGCTGCTACTCATTCACCA - 3'<br>R: 5' - CATTCTTCTTGGGGTCAGCA - 3'                    | 61.3<br>61.3 | 52.0<br>52.0 | 20296   |
| <i>Sry</i>     | Testis-determining factor                              | F: 5' - TTGTCTAGAGAGCATGGAGGGCCATGTCAA - 3'<br>R: 5' - CCACTCCTCTGTGACACTTTAGCCCTCCGA - 3' | 68.7<br>70.3 | 50.0<br>56.6 | 21674   |

Supplemental Table 2. Maternal fat depots and liver weight normalized by total body weight.

|                      | CD-vehicle<br>(n = 6) | CD-DHA<br>(n = 7) | HFD-vehicle<br>(n = 8) | HFD-DHA<br>(n = 7) | <i>P</i> <sub>Diet</sub> | <i>P</i> <sub>DHA</sub> | <i>P</i> <sub>Diet x DHA</sub> |
|----------------------|-----------------------|-------------------|------------------------|--------------------|--------------------------|-------------------------|--------------------------------|
| Subcutaneous fat/ BW | 2.83 ± 0.37           | 2.46 ± 0.24       | 5.66 ± 0.73            | 5.24 ± 0.95        | < <b>0.001</b>           | 0.556                   | 0.974                          |
| Mesenteric fat/ BW   | 2.80 ± 0.36           | 2.77 ± 0.51       | 3.66 ± 0.55            | 7.17 ± 2.24        | <b>0.039</b>             | 0.162                   | 0.156                          |
| Retroperitoneal/ BW  | 1.90 ± 0.18           | 1.69 ± 0.24       | 4.28 ± 0.42            | 4.00 ± 0.66        | < <b>0.001</b>           | 0.578                   | 0.945                          |
| Liver/ BW            | 41.40 ± 2.02          | 42.86 ± 2.69      | 41.49 ± 3.13           | 38.29 ± 0.69       | 0.369                    | 0.725                   | 0.351                          |

Values are means ± SEM. Differences were calculated by two-way ANOVA followed Sidak's post-test. BW: Body weight

Supplemental Table 3. Fatty acid profile in maternal livers.

| Fatty Acid (mg/100g)          | CD-vehicle<br>(n = 5) | CD-DHA<br>(n = 7) | HFD-vehicle<br>(n = 6) | HFD-DHA<br>(n = 7) | <i>P</i> <sub>Diet</sub> | <i>P</i> <sub>DHA</sub> | <i>P</i> <sub>Diet x DHA</sub> |
|-------------------------------|-----------------------|-------------------|------------------------|--------------------|--------------------------|-------------------------|--------------------------------|
| <b>SFAs</b>                   |                       |                   |                        |                    |                          |                         |                                |
| C12:0 Lauric acid             | 1.2 ± 0.5             | 1.7 ± 0.5         | 3.3 ± 1.1              | 3.9 ± 1.3          | <b>0.037</b>             | 0.570                   | 0.975                          |
| C14:0 Myristic acid           | 16.2 ± 2.1            | 25.5 ± 3.8        | 54.1 ± 10.6            | 49.0 ± 11.8        | <b>0.002</b>             | 0.817                   | 0.422                          |
| C16:0 Palmitic acid           | 1219.4 ± 104.6        | 1405.9 ± 123.6    | 2323.9 ± 515.2         | 2463.1 ± 489.8     | <b>0.010</b>             | 0.675                   | 0.951                          |
| C18:0 Stearic acid            | 606.2 ± 34.1          | 600.8 ± 107.5     | 1215.9 ± 553.1         | 970.1 ± 332.3      | 0.157                    | 0.710                   | 0.722                          |
| C20:0 Arachidic acid          | 4.0 ± 1.6             | 7.4 ± 2.4         | 19.5 ± 17.6            | 25.4 ± 7.8         | 0.099                    | 0.638                   | 0.902                          |
| C22:0 Behenic acid            | 3.4 ± 0.9             | 3.7 ± 0.6         | 1.7 ± 0.7              | 2.8 ± 0.5          | 0.061                    | 0.303                   | 0.552                          |
| C24:0 Lignoceric acid         | 3.9 ± 1.0             | 12.1 ± 7.0        | 18.0 ± 14.2            | 1.5 ± 0.6          | 0.827                    | 0.610                   | 0.136                          |
| ∑ SFAs                        | 1854.4 ± 135.9        | 2057.8 ± 188.4    | 3636.7 ± 1008.2        | 3516.0 ± 773.9     | <b>0.024</b>             | 0.951                   | 0.811                          |
| <b>MUFAs</b>                  |                       |                   |                        |                    |                          |                         |                                |
| C16:1 Palmitoleic acid        | 42.8 ± 12.8           | 93.0 ± 15.4       | 267.2 ± 155.0          | 145.3 ± 41.3       | 0.095                    | 0.655                   | 0.289                          |
| C18:1 Oleic acid              | 751.8 ± 90.3          | 967.7 ± 105.1     | 3087.7 ± 824.7         | 3396.4 ± 689.6     | <b>&lt;0.001</b>         | 0.647                   | 0.935                          |
| C20:1 Eicosanoic acid         | 11.4 ± 1.6            | 12.8 ± 1.7        | 29.6 ± 6.4             | 50.7 ± 9.9         | <b>&lt;0.001</b>         | 0.108                   | 0.136                          |
| C22:1 Erucic acid             | 3.6 ± 1.6             | 4.4 ± 1.2         | 5.7 ± 3.6              | 10.6 ± 2.4         | 0.101                    | 0.252                   | 0.389                          |
| C24:1 Nervonic acid           | 1.2 ± 1.2             | 1.8 ± 1.1         | 2.7 ± 0.9              | 0.01 ± 0.01        | 0.861                    | 0.267                   | 0.102                          |
| ∑ MUFAs                       | 813.4 ± 95.3          | 1082.8 ± 117.8    | 3394.9 ± 931.0         | 3610.5 ± 728.1     | <b>0.001</b>             | 0.698                   | 0.966                          |
| <b>PUFAs N-6</b>              |                       |                   |                        |                    |                          |                         |                                |
| C18:2 Linoleic acid           | 1069.4 ± 66.8         | 1267.2 ± 123.1    | 2009.6 ± 517.5         | 1865.0 ± 386.2     | <b>0.035</b>             | 0.939                   | 0.622                          |
| C18:3 Gamma-linolenic acid    | 13.1 ± 7.6            | 11.9 ± 6.7        | 111.3 ± 52.5           | 31.5 ± 27.6        | 0.065                    | 0.195                   | 0.208                          |
| C20:2 Eicosadienoic acid      | 18.6 ± 2.0            | 21.0 ± 3.0        | 34.3 ± 8.7             | 38.2 ± 9.7         | <b>0.033</b>             | 0.664                   | 0.921                          |
| C20:3 Dihomo-γ-linolenic acid | 23.3 ± 3.4            | 25.5 ± 2.1        | 31.0 ± 8.8             | 21.6 ± 5.7         | 0.739                    | 0.530                   | 0.320                          |
| C20:4 Arachidonic acid        | 500.5 ± 41.0          | 484.0 ± 30.0      | 624.4 ± 31.3           | 457.0 ± 86.5       | 0.403                    | 0.120                   | 0.198                          |
| ∑ n-6 FAs                     | 1624.9 ± 91.5         | 1809.7 ± 145.4    | 2810.5 ± 579.4         | 2413.4 ± 463.3     | <b>0.034</b>             | 0.791                   | 0.470                          |
| <b>PUFAs N-3</b>              |                       |                   |                        |                    |                          |                         |                                |
| C18:3 Alfa-linolenic acid     | 22.5 ± 10.0           | 28.8 ± 12.5       | 62.9 ± 15.0            | 20.0 ± 8.4         | 0.199                    | 0.140                   | 0.052                          |
| C20:5 Eicosapentaenoic acid   | 22.2 ± 3.1            | 26.4 ± 3.1        | 35.9 ± 18.7            | 41.3 ± 8.3         | 0.185                    | 0.654                   | 0.958                          |
| C22:5 Docosapentaenoic acid   | 53.3 ± 3.5            | 58.0 ± 4.0        | 43.6 ± 8.1             | 34.3 ± 8.2         | <b>0.021</b>             | 0.737                   | 0.309                          |
| C22:6 Docosahexaenoic acid    | 752.3 ± 20.1          | 756.7 ± 48.1      | 687.6 ± 73.6           | 570.2 ± 100.0      | 0.100                    | 0.448                   | 0.414                          |
| ∑ n-3 FAs                     | 850.3 ± 12.4          | 869.9 ± 55.1      | 831.0 ± 107.3          | 665.7 ± 120.6      | 0.237                    | 0.437                   | 0.326                          |
| ∑ PUFAs                       | 2515.8 ± 78.5         | 2687.4 ± 186.9    | 3609.4 ± 642.2         | 3156.6 ± 599.0     | 0.115                    | 0.770                   | 0.518                          |
| C20:5/ C18:3 n-3              | 1.9 ± 0.6             | 1.6 ± 0.3         | 0.4 ± 0.2              | 5.3 ± 2.1          | 0.375                    | 0.071                   | <b>0.047</b>                   |
| n-3/n-6 FAs                   | 0.5 ± 0.02            | 0.5 ± 0.02        | 0.3 ± 0.1              | 0.3 ± 0.02         | <b>&lt;0.001</b>         | 0.162                   | 0.711                          |
| 18:3/18:2 n-6                 | 0.02 ± 0.01           | 0.01 ± 0.00       | 0.05 ± 0.02            | 0.03 ± 0.01        | <b>0.017</b>             | 0.342                   | 0.575                          |
| 20:4/20:3 n-6                 | 24.1 ± 4.6            | 20.3 ± 2.4        | 27.6 ± 6.0             | 26.5 ± 7.4         | 0.400                    | 0.666                   | 0.816                          |

Values are means ± SEM. Differences were calculated by two-way ANOVA followed Sidak's post-test.

Supplemental Table 4. Fatty acid profile in placentas from male fetuses.

| Fatty Acid (mg/100g)          | CD-vehicle<br>(n = 5) | CD-DHA<br>(n = 3) | HFD-vehicle<br>(n = 5) | HFD-DHA<br>(n = 5)        | <i>P</i> <sub>Diet</sub> | <i>P</i> <sub>DHA</sub> | <i>P</i> <sub>Diet x DHA</sub> |
|-------------------------------|-----------------------|-------------------|------------------------|---------------------------|--------------------------|-------------------------|--------------------------------|
| <b>SFAs</b>                   |                       |                   |                        |                           |                          |                         |                                |
| C12:0 Lauric acid             | 0.13 ± 0.06           | ND                | 0.30 ± 0.11            | 0.21 ± 0.12               | -                        | -                       | -                              |
| C14:0 Myristic acid           | 4.07 ± 0.57           | 3.11 ± 0.33       | 4.67 ± 1.15            | 3.89 ± 0.34               | 0.385                    | 0.281                   | 0.906                          |
| C16:0 Palmitic acid           | 177.9 ± 16.1          | 165.0 ± 18.6      | 182.6 ± 22.1           | 174.1 ± 9.9               | 0.702                    | 0.556                   | 0.904                          |
| C18:0 Stearic acid            | 234.5 ± 19.5          | 214.1 ± 16.9      | 253.9 ± 12.0           | 228.6 ± 6.9               | 0.271                    | 0.144                   | 0.870                          |
| C20:0 Arachidic acid          | 2.04 ± 0.41           | 1.79 ± 0.40       | 3.68 ± 1.78            | 1.34 ± 0.18               | 0.584                    | 0.244                   | 0.343                          |
| C22:0 Behenic acid            | 4.59 ± 0.34           | 2.82 ± 1.43       | 4.81 ± 0.25            | 4.65 ± 0.33               | 0.083                    | 0.101                   | 0.167                          |
| C24:0 Lignoceric acid         | 12.04 ± 1.11          | 12.28 ± 1.57      | 6.18 ± 0.95            | 6.72 ± 0.32               | <b>&lt;0.001</b>         | 0.702                   | 0.883                          |
| Σ SFAs                        | 435.2 ± 36.1          | 399.1 ± 33.2      | 456.1 ± 36.4           | 419.5 ± 16.7              | 0.540                    | 0.286                   | 0.994                          |
| <b>MUFAs</b>                  |                       |                   |                        |                           |                          |                         |                                |
| C16:1 Palmitoleic acid        | 6.67 ± 0.79           | 7.71 ± 1.66       | 5.75 ± 0.72            | 8.43 ± 0.83               | 0.918                    | 0.068                   | 0.397                          |
| C18:1 Oleic acid              | 28.36 ± 3.92          | 26.81 ± 4.08      | 52.78 ± 19.91          | 27.35 ± 6.84              | 0.333                    | 0.296                   | 0.353                          |
| C20:1 Eicosanoic acid         | 9.26 ± 3.38           | 6.18 ± 0.87       | 15.00 ± 4.99           | 10.35 ± 1.06              | 0.184                    | 0.295                   | 0.828                          |
| C22:1 Erucic acid             | 5.40 ± 0.79           | 5.70 ± 0.91       | 3.22 ± 1.13            | 2.64 ± 0.46               | <b>0.011</b>             | 0.875                   | 0.625                          |
| C24:1 Nervonic acid           | ND                    | ND                | ND                     | ND                        | -                        | -                       | -                              |
| Σ MUFAs                       | 49.69 ± 6.72          | 46.40 ± 5.88      | 76.75 ± 18.54          | 48.77 ± 8.09              | 0.257                    | 0.230                   | 0.338                          |
| <b>PUFAs N-6</b>              |                       |                   |                        |                           |                          |                         |                                |
| C18:2 Linoleic acid           | 56.43 ± 5.41          | 53.26 ± 4.19      | 49.82 ± 7.47           | 51.49 ± 4.34              | 0.498                    | 0.903                   | 0.694                          |
| C18:3 Gamma-linolenic acid    | 0.33 ± 0.13           | 0.33 ± 0.03       | 0.32 ± 0.13            | 0.42 ± 0.06               | 0.683                    | 0.805                   | 0.798                          |
| C20:2 Eicosadienoic acid      | 4.80 ± 4.80           | ND                | ND                     | ND                        | -                        | -                       | -                              |
| C20:3 Dihomo-γ-linolenic acid | 14.30 ± 2.26          | 16.55 ± 1.42      | 7.99 ± 2.35            | 15.97 ± 1.19 <sup>b</sup> | 0.116                    | <b>0.026</b>            | 0.185                          |
| C20:4 Arachidonic acid        | 153.4 ± 17.4          | 142.8 ± 15.6      | 154.3 ± 22.2           | 160.8 ± 8.7               | 0.600                    | 0.909                   | 0.639                          |
| Σ n-6 FAs                     | 229.2 ± 25.4          | 212.9 ± 19.3      | 212.5 ± 27.6           | 228.7 ± 13.5              | 0.984                    | 0.997                   | 0.506                          |
| <b>PUFAs N-3</b>              |                       |                   |                        |                           |                          |                         |                                |
| C18:3 Alfa-linolenic acid     | 2.87 ± 0.24           | 3.18 ± 0.20       | 3.46 ± 0.23            | 3.70 ± 0.35               | 0.076                    | 0.353                   | 0.917                          |
| C20:5 Eicosapentaenoic acid   | 7.69 ± 1.00           | 8.64 ± 2.53       | 18.43 ± 2.06           | 19.82 ± 1.39              | <b>&lt; 0.001</b>        | 0.512                   | 0.901                          |
| C22:5 Docosapentaenoic acid   | 11.12 ± 0.84          | 12.32 ± 0.46      | 10.28 ± 0.42           | 10.04 ± 0.36              | <b>0.020</b>             | 0.433                   | 0.246                          |
| C22:6 Docosahexaenoic acid    | 180.0 ± 17.9          | 179.4 ± 10.1      | 135.5 ± 17.6           | 153.6 ± 7.1               | <b>0.038</b>             | 0.577                   | 0.552                          |
| Σ n-3 FAs                     | 201.7 ± 19.1          | 203.6 ± 11.3      | 167.7 ± 19.1           | 187.2 ± 8.0               | 0.153                    | 0.532                   | 0.605                          |
| Σ PUFAs                       | 430.9 ± 44.4          | 416.5 ± 0         | 380.2 ± 0              | 415.9 ± 0                 | 0.535                    | 0.796                   | 0.545                          |
| C20:5/ C18:3 n-3              | 2.77 ± 0.45           | 2.65 ± 0.83       | 5.38 ± 0.63            | 5.44 ± 0.37               | <b>0.001</b>             | 0.784                   | 0.864                          |
| n-3/n-6 FAs                   | 1.89 ± 0.02           | 1.96 ± 0.66       | 1.80 ± 0.01            | 1.82 ± 0.02               | 0.341                    | 0.217                   | 0.177                          |
| 18:3/18:2 n-6                 | 0.005 ± 0.001         | 0.006 ± 0         | 0.006 ± 0.002          | 0.008 ± 0.001             | 0.366                    | 0.578                   | 0.904                          |
| 20:4/20:3 n-6                 | 13.73 ± 5.25          | 8.59 ± 0.24       | 41.17 ± 19.00          | 10.15 ± 0.37              | 0.223                    | 0.135                   | 0.275                          |

Values are means ± SEM. Differences were calculated by two-way ANOVA following Sidak's post-test. <sup>b</sup>P < 0.05 between HFD-vehicle and HFD-DHA groups.

Supplemental Table 5. Fatty acid profile in placentas from female fetuses.

| Fatty Acid (mg/100g)          | CD-vehicle<br>(n = 3) | CD-DHA<br>(n = 5) | HFD-vehicle<br>(n = 3) | HFD-DHA<br>(n = 5) | <i>P</i> <sub>Diet</sub> | <i>P</i> <sub>DHA</sub> | <i>P</i> <sub>Diet x DHA</sub> |
|-------------------------------|-----------------------|-------------------|------------------------|--------------------|--------------------------|-------------------------|--------------------------------|
| <b>SFAs</b>                   |                       |                   |                        |                    |                          |                         |                                |
| C12:0 Lauric acid             | 0.21 ± 0.01           | ND                | 0.15 ± 0.15            | 0.09 ± 0.04        | -                        | -                       | -                              |
| C14:0 Myristic acid           | 3.24 ± 0.31           | 4.44 ± 0.71       | 3.84 ± 0.28            | 3.26 ± 0.22        | 0.583                    | 0.560                   | 0.113                          |
| C16:0 Palmitic acid           | 163.5 ± 9.5           | 200.8 ± 21.9      | 189.1 ± 16.2           | 160.0 ± 9.6        | 0.669                    | 0.816                   | 0.080                          |
| C18:0 Stearic acid            | 230.6 ± 6.6           | 253.8 ± 25.5      | 246.3 ± 22.6           | 224.0 ± 10.9       | 0.735                    | 0.982                   | 0.286                          |
| C20:0 Arachidic acid          | 1.58 ± 0.29           | 3.14 ± 0.75       | 1.49 ± 0.16            | 1.25 ± 0.1         | 0.080                    | 0.222                   | 0.107                          |
| C22:0 Behenic acid            | 4.89 ± 0.24           | 4.77 ± 0.43       | 4.88 ± 0.49            | 4.65 ± 0.21        | 0.858                    | 0.657                   | 0.882                          |
| C24:0 Lignoceric acid         | 10.51 ± 1.1           | 13.51 ± 0.61      | 7.18 ± 0.28            | 5.53 ± 0.7         | <b>&lt;0.0001</b>        | 0.378                   | <b>0.009</b>                   |
| ∑ SFAs                        | 414.5 ± 5.6           | 480.4 ± 49.6      | 452.9 ± 38.6           | 398.7 ± 18.6       | 0.580                    | 0.879                   | 0.140                          |
| <b>MUFAs</b>                  |                       |                   |                        |                    |                          |                         |                                |
| C16:1 Palmitoleic acid        | 7.04 ± 1.12           | 5.25 ± 0.43       | 9.99 ± 1.34            | 6.51 ± 1.34        | 0.089                    | <b>0.039</b>            | 0.471                          |
| C18:1 Oleic acid              | 24.09 ± 3.52          | 32.79 ± 4.02      | 34.48 ± 3.49           | 54.34 ± 25.17      | 0.368                    | 0.420                   | 0.750                          |
| C20:1 Eicosanoic acid         | 5.32 ± 0.45           | 15.16 ± 3.78      | 10.56 ± 1.3            | 8.63 ± 0.68        | 0.808                    | 0.155                   | <b>0.043</b>                   |
| C22:1 Erucic acid             | 4.8 ± 0.54            | 4.54 ± 0.86       | 1.98 ± 0.1             | 2.07 ± 0.18        | <b>0.001</b>             | 0.892                   | 0.779                          |
| C24:1 Nervonic acid           | ND                    | ND                | ND                     | ND                 | -                        | -                       | -                              |
| ∑ MUFAs                       | 41.25 ± 5.23          | 57.74 ± 7.21      | 57.01 ± 6.06           | 71.56 ± 24.46      | 0.408                    | 0.386                   | 0.956                          |
| <b>PUFAs N-6</b>              |                       |                   |                        |                    |                          |                         |                                |
| C18:2 Linoleic acid           | 49.78 ± 4.74          | 61.97 ± 7.16      | 57.78 ± 5.61           | 45.87 ± 3.85       | 0.516                    | 0.983                   | 0.070                          |
| C18:3 Gamma-linolenic acid    | 0.28 ± 0.03           | 0.68 ± 0.12       | 0.37 ± 0.14            | 0.43 ± 0.11        | 0.527                    | 0.073                   | 0.175                          |
| C20:2 Eicosadienoic acid      | ND                    | 4.91 ± 4.91       | 3.8 ± 1.99             | ND                 | -                        | -                       | -                              |
| C20:3 Dihomo-γ-linolenic acid | 15.14 ± 1.36          | 10.69 ± 2.2       | 17.71 ± 1.69           | 14.4 ± 1.28        | 0.120                    | 0.061                   | 0.766                          |
| C20:4 Arachidonic acid        | 138.9 ± 16.0          | 183.4 ± 20.4      | 184.8 ± 18.6           | 146.9 ± 10.7       | 0.798                    | 0.856                   | <b>0.039</b>                   |
| ∑ n-6 FAs                     | 204.1 ± 21.6          | 261.7 ± 27.0      | 264.5 ± 25.7           | 207.6 ± 15.6       | 0.899                    | 0.989                   | <b>0.035</b>                   |
| <b>PUFAs N-3</b>              |                       |                   |                        |                    |                          |                         |                                |
| C18:3 Alfa-linolenic acid     | 2.95 ± 0.06           | 3.47 ± 0.13       | 3.66 ± 0.33            | 3.27 ± 0.09        | 0.139                    | 0.707                   | <b>0.016</b>                   |
| C20:5 Eicosapentaenoic acid   | 9.11 ± 1.79           | 11.21 ± 2.23      | 25.22 ± 3.67           | 18.78 ± 1.61       | <b>&lt; 0.001</b>        | 0.377                   | 0.096                          |
| C22:5 Docosapentaenoic acid   | 11.29 ± 0.61          | 11.77 ± 0.59      | 10.57 ± 0.59           | 9.79 ± 0.24        | <b>0.025</b>             | 0.772                   | 0.253                          |
| C22:6 Docosahexaenoic acid    | 157.0 ± 13.8          | 212.8 ± 21.6      | 162.7 ± 13.5           | 137.6 ± 11.1       | 0.072                    | 0.402                   | <b>0.041</b>                   |
| ∑ n-3 FAs                     | 180.4 ± 11.1          | 239.2 ± 20.9      | 202.1 ± 14.8           | 169.4 ± 12.5       | 0.203                    | 0.477                   | <b>0.025</b>                   |
| ∑ PUFAs                       | 384.5 ± 35.5          | 500.9 ± 47.8      | 466.6 ± 40.4           | 377.0 ± 28.0       | 0.626                    | 0.754                   | <b>0.030</b>                   |
| C20:5/ C18:3 n-3              | 3.11 ± 0.66           | 3.23 ± 0.63       | 6.87 ± 0.67            | 5.75 ± 0.45        | <b>&lt; 0.001</b>        | 0.438                   | 0.333                          |
| n-3/n-6 FAs                   | 1.89 ± 0.03           | 1.92 ± 0.02       | 1.77 ± 0.02            | 1.82 ± 0.01        | <b>&lt; 0.001</b>        | 0.058                   | 0.674                          |
| 18:3/18:2 n-6                 | 0.01 ± 0              | 0.01 ± 0          | 0.01 ± 0               | 0.01 ± 0           | 0.897                    | 0.080                   | 0.732                          |
| 20:4/20:3 n-6                 | 9.13 ± 0.25           | 21.27 ± 5.17      | 10.44 ± 0.53           | 10.26 ± 0.28       | 0.187                    | 0.110                   | 0.100                          |

Values are means ± SEM. Differences were calculated by two-way ANOVA followed Sidak's post-test.

Supplemental Table 6. Fatty acid profile in liver from male fetuses.

| Fatty Acid (mg/100g)          | CD-vehicle<br>(n = 5) | CD-DHA<br>(n = 3) | HFD-vehicle<br>(n = 6) | HFD-DHA<br>(n = 4)      | <i>P</i> <sub>Diet</sub> | <i>P</i> <sub>DHA</sub> | <i>P</i> <sub>Diet x DHA</sub> |
|-------------------------------|-----------------------|-------------------|------------------------|-------------------------|--------------------------|-------------------------|--------------------------------|
| <b>SFAs</b>                   |                       |                   |                        |                         |                          |                         |                                |
| C12:0 Lauric acid             | 0.001 ± 0.001         | ND                | 0.01 ± 0.001           | 0.002 ± 0.001           | -                        | -                       | -                              |
| C14:0 Myristic acid           | 0.08 ± 0              | 0.08 ± 0.01       | 0.12 ± 0.01            | 0.08 ± 0.02             | 0.207                    | 0.154                   | 0.224                          |
| C16:0 Palmitic acid           | 3.29 ± 0.14           | 3.17 ± 0.19       | 3.67 ± 0.23            | 2.59 ± 0.76             | 0.799                    | 0.150                   | 0.250                          |
| C18:0 Stearic acid            | 2.28 ± 0.06           | 2.3 ± 0.03        | 2.19 ± 0.08            | 1.69 ± 0.43             | 0.109                    | 0.266                   | 0.230                          |
| C20:0 Arachidic acid          | 0.04 ± 0.01           | 0.03 ± 0          | 0.05 ± 0.01            | 0.03 ± 0.01             | 0.452                    | 0.064                   | 0.507                          |
| C22:0 Behenic acid            | 0.03 ± 0              | 0.03 ± 0          | 0.03 ± 0               | 0.02 ± 0.01             | 0.136                    | <b>0.017</b>            | 0.608                          |
| C24:0 Lignoceric acid         | 0.06 ± 0.01           | 0.04 ± 0.02       | 0.03 ± 0               | 0.02 ± 0.01             | <b>0.008</b>             | 0.072                   | 0.651                          |
| Σ SFAs                        | 5.79 ± 0.17           | 5.64 ± 0.15       | 6.09 ± 0.32            | 4.43 ± 1.23             | 0.465                    | 0.158                   | 0.236                          |
| <b>MUFAs</b>                  |                       |                   |                        |                         |                          |                         |                                |
| C16:1 Palmitoleic acid        | 0.41 ± 0.05           | 0.29 ± 0.07       | 0.64 ± 0.06            | 0.22 ± 0.1 <sup>b</sup> | 0.303                    | <b>0.002</b>            | 0.055                          |
| C18:1 Oleic acid              | 0.69 ± 0.02           | 0.74 ± 0.06       | 0.81 ± 0.05            | 0.38 ± 0.2              | 0.241                    | 0.080                   | <b>0.032</b>                   |
| C20:1 Eicosanoic acid         | 0.11 ± 0.02           | 0.09 ± 0.01       | 0.12 ± 0.03            | 0.06 ± 0.02             | 0.742                    | 0.150                   | 0.455                          |
| C22:1 Erucic acid             | 0.04 ± 0.01           | 0.03 ± 0.01       | 0.03 ± 0.01            | 0.03 ± 0.01             | 0.606                    | 0.550                   | 0.763                          |
| C24:1 Nervonic acid           | ND                    | ND                | ND                     | ND                      | -                        | -                       | -                              |
| Σ MUFAs                       | 1.25 ± 0.07           | 1.15 ± 0.03       | 1.60 ± 0.12            | 0.68 ± 0.3 <sup>b</sup> | 0.727                    | <b>0.009</b>            | <b>0.026</b>                   |
| <b>PUFAs N-6</b>              |                       |                   |                        |                         |                          |                         |                                |
| C18:2 Linoleic acid           | 1.10 ± 0.07           | 0.89 ± 0.09       | 1.07 ± 0.09            | 0.81 ± 0.25             | 0.712                    | 0.118                   | 0.847                          |
| C18:3 Gamma-linolenic acid    | 0.05 ± 0.02           | 0.05 ± 0.02       | 0.02 ± 0               | 0 ± 0                   | <b>0.010</b>             | 0.644                   | 0.631                          |
| C20:2 Eicosadienoic acid      | 0.06 ± 0.04           | ND                | 0.04 ± 0.03            | ND                      | -                        | -                       | -                              |
| C20:3 Dihomo-γ-linolenic acid | 0.12 ± 0.01           | 0.11 ± 0.01       | 0.09 ± 0.02            | 0.09 ± 0.03             | 0.219                    | 0.825                   | 0.933                          |
| C20:4 Arachidonic acid        | 1.56 ± 0.07           | 1.38 ± 0.01       | 1.54 ± 0.09            | 0.84 ± 0.46             | 0.229                    | 0.067                   | 0.259                          |
| Σ n-6 FAs                     | 2.88 ± 0.12           | 2.43 ± 0.11       | 2.76 ± 0.18            | 1.75 ± 0.69             | 0.248                    | 0.069                   | 0.485                          |
| <b>PUFAs N-3</b>              |                       |                   |                        |                         |                          |                         |                                |
| C18:3 Alfa-linolenic acid     | 0.08 ± 0.06           | 0.01 ± 0          | 0.02 ± 0               | 0.01 ± 0                | 0.474                    | 0.336                   | 0.455                          |
| C20:5 Eicosapentaenoic acid   | 0.06 ± 0.01           | 0.07 ± 0.03       | 0.17 ± 0.02            | 0.11 ± 0.03             | <b>0.017</b>             | 0.395                   | 0.252                          |
| C22:5 Docosapentaenoic acid   | 0.04 ± 0              | 0.05 ± 0.01       | 0.04 ± 0.00            | 0.03 ± 0.01             | 0.068                    | 0.946                   | 0.234                          |
| C22:6 Docosahexaenoic acid    | 3.12 ± 0.23           | 2.73 ± 0.27       | 2.09 ± 0.09            | 1.76 ± 0.55             | <b>0.005</b>             | 0.253                   | 0.922                          |
| Σ n-3 FAs                     | 3.30 ± 0.27           | 2.87 ± 0.22       | 2.32 ± 0.10            | 1.92 ± 0.59             | <b>0.012</b>             | 0.274                   | 0.900                          |
| Σ PUFAs                       | 6.18 ± 0.38           | 5.3 ± 0.33        | 5.08 ± 0.25            | 3.66 ± 1.23             | <b>0.049</b>             | 0.091                   | 0.681                          |
| EPA/ALA                       | 6.80 ± 4.63           | 7.64 ± 5.35       | 7.89 ± 1.55            | 8.29 ± 1.05             | 0.803                    | 0.859                   | 0.951                          |
| n-3/n-6 FAs                   | 1.14 ± 0.05           | 1.18 ± 0.05       | 0.84 ± 0.02            | 1.24 ± 0.34             | 0.472                    | 0.199                   | 0.281                          |
| C18:3/18:2 n-6                | 0.04 ± 0.01           | 0.05 ± 0.02       | 0.02 ± 0.01            | 0 ± 0                   | <b>0.007</b>             | 0.825                   | 0.388                          |
| 20:4/20:3 n-6                 | 13.28 ± 0.84          | 12.30 ± 0.88      | 30.05 ± 12.67          | 8.99 ± 3.18             | 0.475                    | 0.250                   | 0.292                          |

Values are means ± SEM. Differences were calculated by two-way ANOVA followed Sidak's post-test. <sup>b</sup>P < 0.05 between HFD-vehicle and HFD-DHA groups.

Supplemental Table 7. Fatty acid profile in liver from female fetuses.

| Fatty Acid (mg/100g)          | CD-vehicle<br>(n = 3) | CD-DHA<br>(n = 4) | HFD-vehicle<br>(n = 3) | HFD-DHA<br>(n = 5) | <i>P</i> <sub>Diet</sub> | <i>P</i> <sub>DHA</sub> | <i>P</i> <sub>Diet x DHA</sub> |
|-------------------------------|-----------------------|-------------------|------------------------|--------------------|--------------------------|-------------------------|--------------------------------|
| <b>SFAs</b>                   |                       |                   |                        |                    |                          |                         |                                |
| C12:0 Lauric acid             | 0.003 ± 0.002         | 0.003 ± 0.002     | ND                     | 0.003 ± 0.002      | -                        | -                       | -                              |
| C14:0 Myristic acid           | 0.08 ± 0.01           | 0.09 ± 0.01       | 0.11 ± 0.02            | 0.09 ± 0.02        | 0.402                    | 0.472                   | 0.829                          |
| C16:0 Palmitic acid           | 3.15 ± 0.41           | 3.4 ± 0.32        | 3.4 ± 0.39             | 2.85 ± 0.64        | 0.785                    | 0.469                   | 0.790                          |
| C18:0 Stearic acid            | 2.27 ± 0.24           | 2.19 ± 0.14       | 2.07 ± 0.15            | 1.87 ± 0.42        | 0.450                    | 0.853                   | 0.670                          |
| C20:0 Arachidic acid          | 0.04 ± 0.01           | 0.05 ± 0          | 0.04 ± 0.03            | 0.03 ± 0.01        | 0.364                    | 0.658                   | 0.970                          |
| C22:0 Behenic acid            | 0.03 ± 0              | 0.02 ± 0.01       | 0.03 ± 0               | 0.02 ± 0           | 0.815                    | 0.597                   | 0.065                          |
| C24:0 Lignoceric acid         | 0.06 ± 0.01           | 0.03 ± 0.02       | 0.03 ± 0               | 0.02 ± 0.01        | 0.067                    | 0.224                   | 0.072                          |
| Σ SFAs                        | 5.63 ± 0.65           | 5.77 ± 0.46       | 5.67 ± 0.57            | 4.88 ± 1.09        | 0.640                    | 0.609                   | 0.720                          |
| <b>MUFAs</b>                  |                       |                   |                        |                    |                          |                         |                                |
| C16:1 Palmitoleic acid        | 0.4 ± 0.08            | 0.49 ± 0.06       | 0.61 ± 0.13            | 0.4 ± 0.14         | 0.620                    | 0.220                   | 0.630                          |
| C18:1 Oleic acid              | 0.69 ± 0.09           | 0.73 ± 0.07       | 0.8 ± 0.12             | 0.67 ± 0.15        | 0.863                    | 0.512                   | 0.753                          |
| C20:1 Eicosanoic acid         | 0.1 ± 0.03            | 0.05 ± 0.02       | 0.09 ± 0.01            | 0.08 ± 0.02        | 0.645                    | 0.396                   | 0.191                          |
| C22:1 Erucic acid             | 0.05 ± 0.02           | 0.08 ± 0.01       | 0.04 ± 0.01            | 0.03 ± 0.01        | <b>0.036</b>             | 0.147                   | 0.315                          |
| C24:1 Nervonic acid           | ND                    | ND                | ND                     | ND                 | -                        | -                       | -                              |
| Σ MUFAs                       | 1.23 ± 0.18           | 1.35 ± 0.11       | 1.53 ± 0.28            | 1.18 ± 0.29        | 0.799                    | 0.360                   | 0.653                          |
| <b>PUFAs N-6</b>              |                       |                   |                        |                    |                          |                         |                                |
| C18:2 Linoleic acid           | 1.06 ± 0.13           | 0.7 ± 0.25        | 1.1 ± 0.19             | 0.82 ± 0.2         | 0.699                    | 0.854                   | 0.167                          |
| C18:3 Gamma-linolenic acid    | 0.03 ± 0.02           | 0 ± 0             | 0.01 ± 0               | 0.01 ± 0           | 0.329                    | 0.139                   | 0.146                          |
| C20:2 Eicosadienoic acid      | 0.05 ± 0.05           | ND                | 0.01 ± 0.01            | ND                 | -                        | -                       | -                              |
| C20:3 Dihomo-γ-linolenic acid | 0.13 ± 0.01           | 0.14 ± 0.01       | 0.12 ± 0.01            | 0.1 ± 0.02         | 0.270                    | 0.514                   | 0.787                          |
| C20:4 Arachidonic acid        | 1.49 ± 0.19           | 1.48 ± 0.19       | 1.09 ± 0.54            | 1.23 ± 0.31        | 0.346                    | 0.819                   | 0.845                          |
| Σ n-6 FAs                     | 2.75 ± 0.33           | 2.31 ± 0.33       | 2.33 ± 0.73            | 2.16 ± 0.73        | 0.590                    | 0.796                   | 0.573                          |
| <b>PUFAs N-3</b>              |                       |                   |                        |                    |                          |                         |                                |
| C18:3 Alfa-linolenic acid     | 0.02 ± 0              | 0.02 ± 0.01       | 0.03 ± 0.01            | 0.03 ± 0.01        | 0.347                    | 0.801                   | 0.839                          |
| C20:5 Eicosapentaenoic acid   | 0.07 ± 0.03           | 0.09 ± 0.02       | 0.17 ± 0.01            | 0.11 ± 0.02        | <b>0.013</b>             | 0.086                   | 0.313                          |
| C22:5 Docosapentaenoic acid   | 0.04 ± 0              | 0.04 ± 0.02       | 0.04 ± 0               | 0.03 ± 0.01        | 0.573                    | 0.425                   | 0.435                          |
| C22:6 Docosahexaenoic acid    | 3.00 ± 0.48           | 2.79 ± 0.34       | 2.06 ± 0.24            | 1.77 ± 0.42        | <b>0.035</b>             | 0.924                   | 0.554                          |
| Σ n-3 FAs                     | 3.13 ± 0.49           | 2.94 ± 0.35       | 2.3 ± 0.26             | 1.93 ± 0.45        | 0.057                    | 0.843                   | 0.527                          |
| Σ PUFAs                       | 5.89 ± 0.81           | 5.25 ± 0.66       | 4.63 ± 0.99            | 4.1 ± 0.97         | 0.220                    | 0.958                   | 0.541                          |
| EPA/ALA                       | 3.23 ± 0.84           | 4.45 ± 1.09       | 7.54 ± 1.45            | 5.24 ± 1.03        | 0.053                    | 0.160                   | 0.650                          |
| n-3/n-6 FAs                   | 1.13 ± 0.06           | 1.29 ± 0.11       | 1.25 ± 0.41            | 1.13 ± 0.25        | 0.931                    | 0.583                   | 0.927                          |
| 18:3/18:2 n-6                 | 0.02 ± 0.02           | 0 ± 0             | 0.01 ± 0               | 0.02 ± 0.02        | 0.940                    | 0.221                   | 0.876                          |
| 20:4/20:3 n-6                 | 11.57 ± 0.97          | 10.8 ± 0.84       | 8.52 ± 4.28            | 9.92 ± 2.57        | 0.457                    | 0.679                   | 0.904                          |

Values are means ± SEM. Differences were calculated by two-way ANOVA followed Sidak's post-test.
